# Supplementary material for: Genome-wide and Mendelian randomisation studies of liver MRI yield insights into the pathogenesis of steatohepatitis
Source: PubMed Central journal article supplement (PMC7372222; doi:10.1016/j.jhep.2020.03.032), 2020-08
Supplement: mmc1.pdf [file mmc1.pdf]

# Genome-wide and Mendelian randomisation studies of liver MRI yield insights into the pathogenesis of steatohepatitis

Constantinos A Parisinos, Henry R Wilman, E Louise Thomas, Matt Kelly, Rowan C Nicholls, John McGonigle, Stefan Neubauer, Aroon D Hingorani, Riyaz S Patel, Harry Hemingway, Jimmy D Bell, Rajarshi Banerjee, Hanieh Yaghootkar

## Table of contents

|                            |    |
|----------------------------|----|
| Supplementary Methods..... | 2  |
| Fig. S1.....               | 7  |
| Fig. S2.....               | 8  |
| Fig. S3.....               | 9  |
| Fig. S4.....               | 10 |
| Fig. S5.....               | 11 |
| Table S1.....              | 12 |
| Table S2.....              | 14 |
| Table S3.....              | 15 |
| Table S4.....              | 20 |
| Table S5.....              | 20 |
| Table S6.....              | 23 |
| References.....            | 25 |

## Supplementary Methods

### **The relationship between cT1 and Liver inflammation and Fibrosis (LIF) score.**

A promising, non-invasive measure of steatohepatitis and fibrosis severity is magnetic resonance imaging (MRI) based corrected T1 (cT1).[1–3] T1 relaxation time reflects extracellular fluid which is characteristic of fibrosis and inflammation. The presence of iron, which can be determined from T2\* maps, has an opposing effect. Combining T2\* and T1 values can correct for this opposing effect, from which cT1 (in milliseconds) is derived. Higher cT1 values are associated with both histological liver inflammation and fibrosis, although their relative contributions to the score are still unknown.[3,4] cT1 has already been used as a non-invasive outcome in randomised controlled trials for non-alcoholic steatohepatitis (NASH)[5] and is associated with liver disease outcomes.[2]

cT1 is a continuous trait, and analysed as such in our GWAS in line with other continuous traits such as blood pressure, BMI and height.[6–8] In some earlier publications, cT1 was reported using the Liver Inflammation and Fibrosis (LIF) score. The LIF score is a tri-linear mapping of cT1 onto a continuous scale from 0 to 4 based on the association of cT1 with histological fibrosis.[3] LIF categories were defined as having no (LIF <1), mild (LIF 1–1.99), moderate (LIF 2–2.99), or severe (LIF 3–4) liver disease.[2] The LIF cut-off of 1.4 had a sensitivity of 91% and a specificity of 52% for the diagnosis of non-alcoholic steatohepatitis (NASH) versus steatosis (AUROC = 0.80), and corresponds to a cT1 value of 780ms; a slightly higher cutoff of 800ms is used in clinical trials[9] and is under evaluation by the FDA and European Medicines Agency as a diagnostic enrichment biomarker for NASH;[3,10] The LIF score is no longer used since the medical and MRI physics community is more familiar with T1 for the assessment of inflammation and fibrosis across all specialties including cardiology and neurology.[5,11–16] In this GWAS, the cT1 values reported

are standardised across the MRI scanner model and field strength and show very high repeatability and reproducibility.[17]

### **Principle of Mendelian Randomisation**

Observational epidemiologic studies measure the association between an exposure and an outcome, however they are vulnerable to confounding, reverse causation and other forms of bias, and do not provide evidence that an observed association is causal. MR uses genetic variants associated with an exposure of interest (e.g. BMI, cholesterol, blood pressure) to assess its causal effect on an outcome of interest (e.g. steatohepatitis). In the classic MR paradigm, genetic associations are free from confounding since they are assigned randomly at conception from parents to offspring (according to Mendel's second law) and reverse causation is precluded since the sequence of the germline is not modifiable by disease. MR can be thought of as analogous to a randomised controlled trial (RCT) that uses naturally randomised genetic variation rather than randomised allocation to a drug or treatment, as the 'intervention'.[18]

Genetic polymorphisms that are associated with an exposure of interest are used as an instrument to randomly allocate study participants to higher or lower levels of the exposure under study. Because allocation to genetic variation in levels of the exposure is random, this study design should be less susceptible to confounding. In addition, the allocation of the polymorphism occurs at conception so this study design should not be vulnerable to reverse causation. The results of a Mendelian randomisation study can be interpreted as follows: If a polymorphism (or a collection of polymorphisms, a genetic instrument) is associated with an exposure and the outcome of interest, then the observed association between the exposure and outcome is likely to be causal. If not, then

the observed association between the exposure and outcome is likely to be an artefact of confounding, reverse causation or other study bias.

We used Mendelian randomisation to evaluate the causal association between multiple metabolic traits and diseases (e.g. insulin resistance, obesity, coronary artery disease) previously observationally associated with our outcome of interest (steatohepatitis). We were able to detect exposures that are likely to be causal (e.g. central obesity, insulin resistance, type 2 diabetes), protective (favourable adiposity), but also detect exposures where previous associations were likely to be down to confounding or other biases (e.g. blood pressure).

Mendelian Randomisation also has limitations and results need to be interpreted alongside other evidence in the field in the spirit of triangulation of evidence.[19] Despite presumed random allocation of genetic polymorphisms according to Mendel's law of independent assortment, this study design is still vulnerable to confounding e.g. by population structure or pleiotropy. Confounding by population structure can be addressed by performing studies within ethnically homogeneous study populations (as in this study). Confounding by pleiotropy can be addressed by selecting polymorphisms that are only associated with the exposure of interest, but not with other exposures that are known to be causally associated with the outcome under study, as well as using statistical methods (e.g. MR Egger) as this manuscript has done to correct for pleiotropy.

To create genetic instruments for possible causes of steatohepatitis, we constructed genetic scores for 24 predominantly metabolic traits. We combined multiple independently inherited polymorphisms to create genetic instruments. These genetic scores are instruments that reflect the combined effect of the polymorphisms included on the exposure of interest. As a result, each score has a much larger effect than any individual polymorphism included in the score. Genetic

instruments were constructed by using the effect sizes of independent, genome-wide significant genetic variants ( $R^2 < 0.1$ ) associated with a particular exposure from previous GWASs. Using genetic instruments from a separate population compared to where the outcome of interest was measured results in less bias and more power, a method known as two-sample Mendelian randomisation.[20] We investigated the potential causal associations between 24 predominantly metabolic traits on cT1 using two-sample Mendelian randomisation analysis.

**Supplementary Methods Table 1. List of genetic instruments used, number of SNPs comprising each genetic instrument, and PMIDs of the manuscripts from which the genetic instruments were derived.**

| Exposure                 | N_snp | PMID           |
|--------------------------|-------|----------------|
| Favourable adiposity     | 14    | PMID: 30352878 |
| Insulin resistance       | 53    | PMID: 27841877 |
| Insulin secretion        | 11    | PMID: 22885924 |
| Type 2 diabetes          | 89    | PMID: 29632382 |
| 2 hour Glucose           | 8     | PMID: 22885924 |
| Fasting glucose          | 33    | PMID: 22885924 |
| Fasting Insulin          | 14    | PMID: 22885924 |
| NAFLD                    | 4     | PMID: 21423719 |
| Body fat percentage      | 10    | PMID: 26833246 |
| BMI                      | 73    | PMID: 25673413 |
| Coronary artery disease  | 64    | PMID: 26343387 |
| Systolic blood pressure  | 89    | PMID: 27618452 |
| Diastolic blood pressure | 109   | PMID: 27618452 |
| LDL Cholesterol          | 80    | PMID: 24097068 |

|                                                         |     |                |
|---------------------------------------------------------|-----|----------------|
| Triglycerides                                           | 62  | PMID: 24097068 |
| HDL Cholesterol                                         | 98  | PMID: 24097068 |
| Waist Hip ratio BMI adjusted                            | 53  | PMID: 30239722 |
| Waist Hip ratio BMI adjusted (Female specific variants) | 47  | PMID: 30239722 |
| Waist Hip ratio BMI adjusted (Male specific variants)   | 6   | PMID: 30239722 |
| Ferritin                                                | 6   | PMID: 25352340 |
| Transferrin                                             | 9   | PMID: 25352340 |
| Transferrin saturation                                  | 5   | PMID: 25352340 |
| Iron                                                    | 5   | PMID: 25352340 |
| Height                                                  | 809 | PMID: 30124842 |

**Fig. S1. Histograms of cT1 values in UK Biobank stratified by sex.** 2.6% of women (169 / 6,455) and 5.3% of men (299 / 5,595) had values above 800ms, a threshold that has been set in current clinical trials as a cut-off for steatohepatitis (800ms shown by red dotted line).

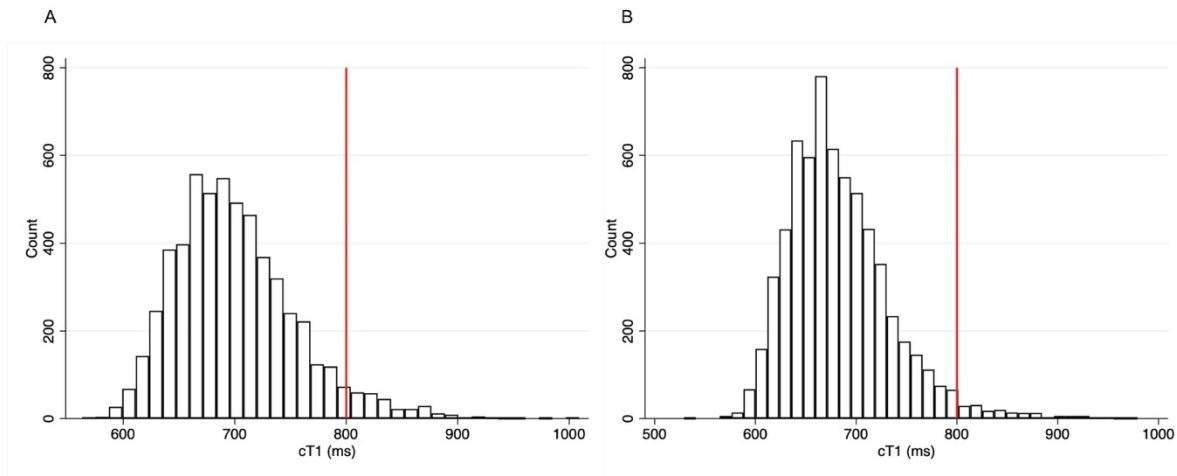

**Fig. S2. Quantile quantile plot for cT1 GWAS.** The observed versus expected  $-\log_{10}(p\text{-values})$  in our GWAS supports normality and shows no evidence of inflation.

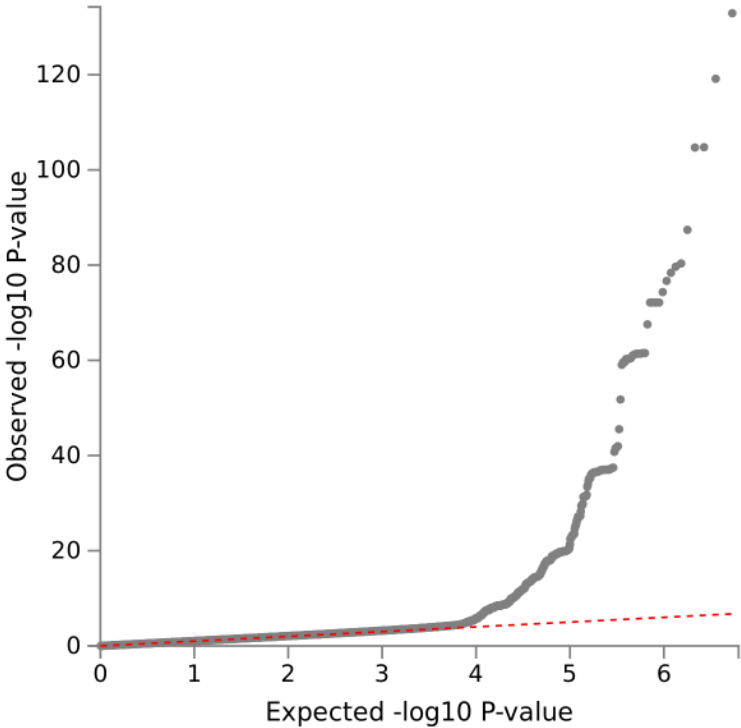



**Fig. S3. cT1 values per *SLC39A8* genotype group. Red lines indicate the median values, blue lines indicate the lower and upper quartiles.**

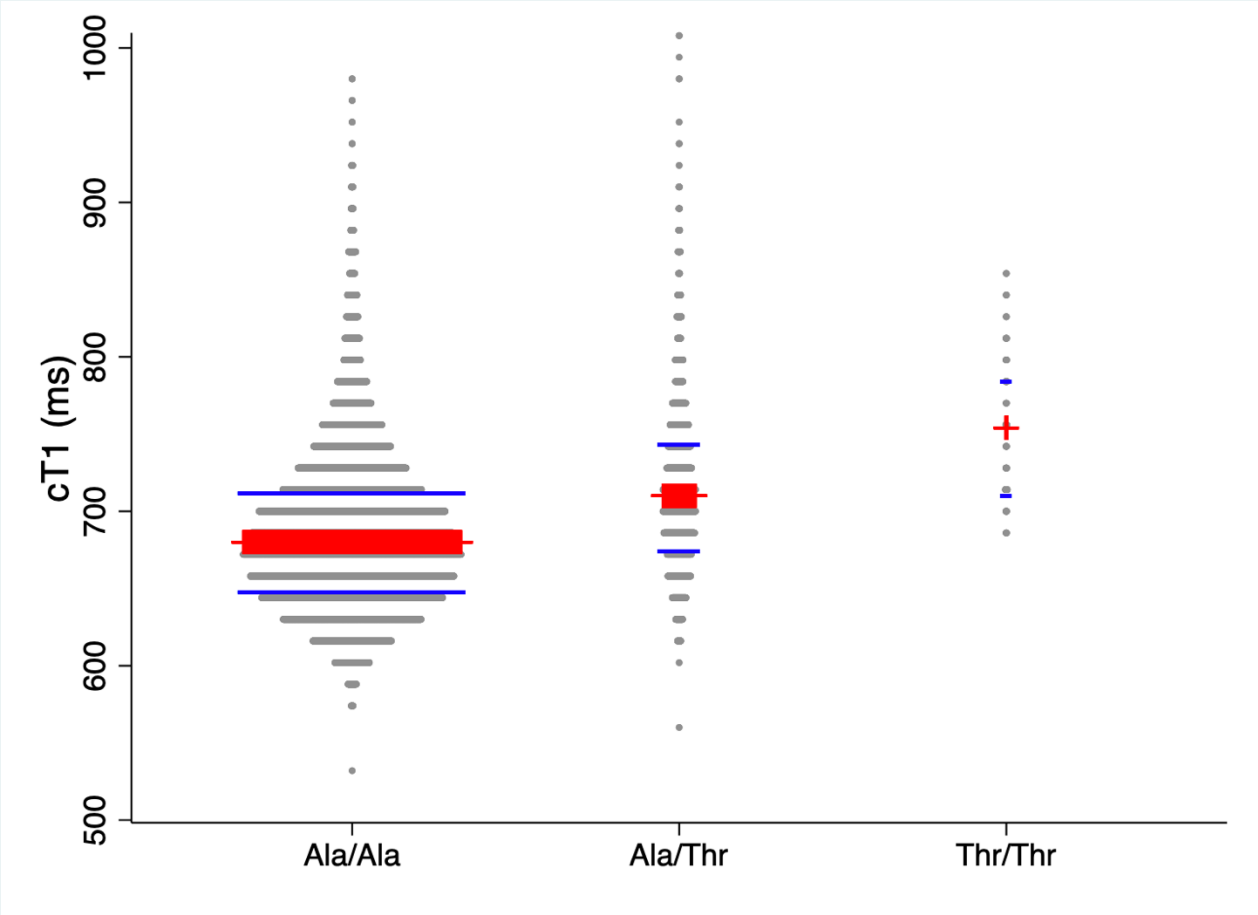

**Fig. S4. Manhattan plot illustrating GWAS of liver PDFF measurements in 14,440 UK Biobank individuals (~12 million imputed variants).** The x-axis is the chromosomal position and y-axis is the significance of association for each variant in  $\log_{10}(\text{p-values})$ . Grey line indicates genome-wide significance level. For the GWAS, a linear mixed model was used. Level of significance:  $p < 5 \times 10^{-8}$ .

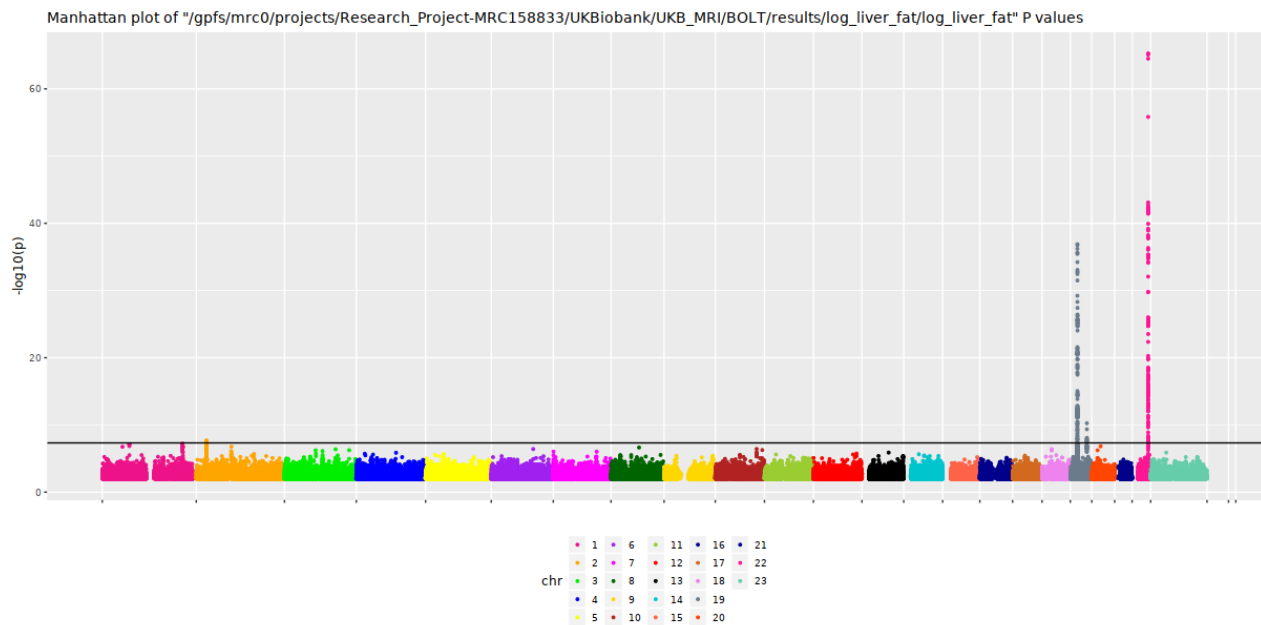

**Fig. S5. Scatterplot of correlation between cT1 and a) BMI b) liver fat% (PDFF), and c) liver iron. P values calculated using t-test. Levels of significance:  $p < 0.05$ .**

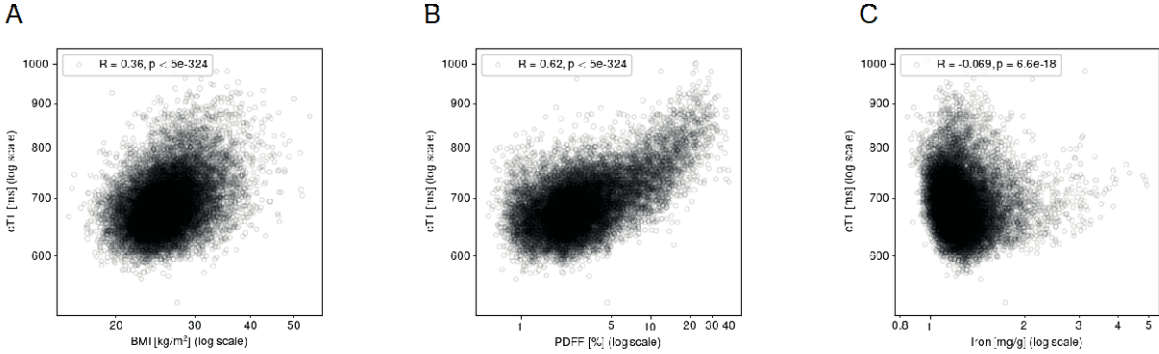

**Table S1. GWAS Sensitivity analyses, with models correcting for a) BMI b) BMI & alcohol intake (in units) c) liver fat PDFFF d) liver iron e) males only f) females only. A linear mixed model was used for genetic associations. Levels of significance:  $p < 5 \times 10^{-8}$ .**

| <b>cT1 (BMI) (N=14,405)</b>               |     |           |    |    |      |                  |                                  |           |           |           |
|-------------------------------------------|-----|-----------|----|----|------|------------------|----------------------------------|-----------|-----------|-----------|
| SNP                                       | CHR | BP        | EA | OA | EAF  | Gene             | variant type                     | BETA      | SE        | P         |
| rs759359281                               | 1   | 220100497 | C  | CA | 0.06 | <i>SLC30A10</i>  | Intron                           | 0.131773  | 0.0242194 | 1.40E-08  |
| rs13107325                                | 4   | 103188709 | T  | C  | 0.07 | <i>SLC39A8</i>   | Missense Variant                 | 0.530298  | 0.0210205 | 2.40E-143 |
| rs111723834                               | 14  | 24572932  | A  | G  | 0.02 | <i>PCK2, NRL</i> | Missense Variant, Intron Variant | 0.29092   | 0.0435268 | 2.20E-12  |
| rs58542926                                | 19  | 19379549  | T  | C  | 0.07 | <i>TM6SF2</i>    | Missense Variant                 | 0.124756  | 0.0208328 | 1.10E-09  |
| rs4820268                                 | 22  | 37469591  | G  | A  | 0.46 | <i>TMPRSS6</i>   | Missense Variant                 | 0.108009  | 0.0132949 | 2.30E-17  |
| rs738409                                  | 22  | 44324727  | G  | C  | 0.21 | <i>PNPLA3</i>    | Missense Variant                 | 0.0656351 | 0.0109403 | 2.20E-10  |
| <b>cT1 (BMI &amp; alcohol) (N=11,893)</b> |     |           |    |    |      |                  |                                  |           |           |           |
|                                           |     |           |    |    |      |                  |                                  | BETA      | SE        | P         |
| rs759359281                               | 1   | 220100497 | C  | CA | 0.06 | <i>SLC30A10</i>  | Intron                           | 0.13711   | 0.0266234 | 1.30E-07  |
| rs13107325                                | 4   | 103188709 | T  | C  | 0.07 | <i>SLC39A8</i>   | Missense Variant                 | 0.536308  | 0.0229941 | 4.20E-122 |
| rs111723834                               | 14  | 24572932  | A  | G  | 0.02 | <i>PCK2, NRL</i> | Missense Variant, Intron Variant | 0.279295  | 0.0478867 | 4.40E-10  |
| rs58542926                                | 19  | 19379549  | T  | C  | 0.07 | <i>TM6SF2</i>    | Missense Variant                 | 0.132978  | 0.0228134 | 5.00E-09  |
| rs4820268                                 | 22  | 37469591  | G  | A  | 0.46 | <i>TMPRSS6</i>   | Missense Variant                 | 0.121534  | 0.0146066 | 3.50E-18  |
| rs738409                                  | 22  | 44324727  | G  | C  | 0.21 | <i>PNPLA3</i>    | Missense Variant                 | 0.0643384 | 0.0119858 | 3.20E-08  |
| <b>cT1 (liver fat) (N=14,440)</b>         |     |           |    |    |      |                  |                                  |           |           |           |
|                                           |     |           |    |    |      |                  |                                  | BETA      | SE        | P         |
| rs759359281                               | 1   | 220100497 | C  | CA | 0.06 | <i>SLC30A10</i>  | Intron                           | 0.126816  | 0.021926  | 1.70E-09  |
| rs13107325                                | 4   | 103188709 | T  | C  | 0.07 | <i>SLC39A8</i>   | Missense Variant                 | 0.540024  | 0.0190318 | 5.60E-179 |

|                    |    |          |   |   |      |                  |                                     |            |            |          |
|--------------------|----|----------|---|---|------|------------------|-------------------------------------|------------|------------|----------|
| <b>rs111723834</b> | 14 | 24572932 | A | G | 0.02 | <i>PCK2, NRL</i> | Missense Variant,<br>Intron Variant | 0.308174   | 0.0394095  | 2.40E-16 |
| <b>rs58542926</b>  | 19 | 19379549 | T | C | 0.07 | <i>TM6SF2</i>    | Missense Variant                    | -0.024769  | 0.0189835  | 1.90E-01 |
| <b>rs4820268</b>   | 22 | 37469591 | G | A | 0.46 | <i>TMPRSS6</i>   | Missense Variant                    | 0.0607271  | 0.00991015 | 5.10E-11 |
| <b>rs738409</b>    | 22 | 44324727 | G | C | 0.21 | <i>PNPLA3</i>    | Missense Variant                    | -0.0308937 | 0.0121655  | 1.90E-02 |

**cT1 (liver iron) (N=14,440)**

|                    |    |           |   |    |      |                  |                                     | <b>BETA</b> | <b>SE</b> | <b>P</b>  |
|--------------------|----|-----------|---|----|------|------------------|-------------------------------------|-------------|-----------|-----------|
| <b>rs759359281</b> | 1  | 220100497 | C | CA | 0.06 | <i>SLC30A10</i>  | Intron                              | 0.136471    | 0.0254803 | 2.80E-08  |
| <b>rs13107325</b>  | 4  | 103188709 | T | C  | 0.07 | <i>SLC39A8</i>   | Missense Variant                    | 0.541497    | 0.0221264 | 1.10E-133 |
| <b>rs111723834</b> | 14 | 24572932  | A | G  | 0.02 | <i>PCK2, NRL</i> | Missense Variant,<br>Intron Variant | 0.289944    | 0.0457921 | 2.9E-11   |
| <b>rs58542926</b>  | 19 | 19379549  | T | C  | 0.07 | <i>TM6SF2</i>    | Missense Variant                    | 0.127372    | 0.0219207 | 4.00E-09  |
| <b>rs4820268</b>   | 22 | 37469591  | G | A  | 0.46 | <i>TMPRSS6</i>   | Missense Variant                    | 0.0542081   | 0.0115437 | 7.40E-07  |
| <b>rs738409</b>    | 22 | 44324727  | G | C  | 0.21 | <i>PNPLA3</i>    | Missense Variant                    | 0.0559764   | 0.01399   | 1.10E-12  |

**cT1 (males) (N=6,640)**

|                    |    |           |   |    |      |                  |                                     | <b>BETA</b> | <b>SE</b> | <b>P</b> |
|--------------------|----|-----------|---|----|------|------------------|-------------------------------------|-------------|-----------|----------|
| <b>rs759359281</b> | 1  | 220100497 | C | CA | 0.06 | <i>SLC30A10</i>  | Intron                              | 0.156337    | 0.0391243 | 5.20E-05 |
| <b>rs13107325</b>  | 4  | 103188709 | T | C  | 0.07 | <i>SLC39A8</i>   | Missense Variant                    | 0.56999     | 0.0331774 | 1.10E-66 |
| <b>rs111723834</b> | 14 | 24572932  | A | G  | 0.02 | <i>PCK2, NRL</i> | Missense Variant,<br>Intron Variant | 0.344737    | 0.0711227 | 4.50E-07 |
| <b>rs58542926</b>  | 19 | 19379549  | T | C  | 0.07 | <i>TM6SF2</i>    | Missense Variant                    | 0.161972    | 0.0334273 | 4.80E-07 |
| <b>rs4820268</b>   | 22 | 37469591  | G | A  | 0.46 | <i>TMPRSS6</i>   | Missense Variant                    | 0.0674141   | 0.017446  | 9.30E-05 |
| <b>rs738409</b>    | 22 | 44324727  | G | C  | 0.21 | <i>PNPLA3</i>    | Missense Variant                    | 0.121098    | 0.0211575 | 7.60E-09 |

**cT1 (females) (N=7,800)**

**BETA SE P**

|                    |    |           |   |    |      |                  |                                     |           |           |          |
|--------------------|----|-----------|---|----|------|------------------|-------------------------------------|-----------|-----------|----------|
| <b>rs759359281</b> | 1  | 220100497 | C | CA | 0.06 | <i>SLC30A10</i>  | Intron                              | 0.124803  | 0.0351335 | 2.60E-04 |
| <b>rs13107325</b>  | 4  | 103188709 | T | C  | 0.07 | <i>SLC39A8</i>   | Missense Variant                    | 0.551638  | 0.0311469 | 2.90E-70 |
| <b>rs111723834</b> | 14 | 24572932  | A | G  | 0.02 | <i>PCK2, NRL</i> | Missense Variant,<br>Intron Variant | 0.268713  | 0.0625125 | 8.90E-06 |
| <b>rs58542926</b>  | 19 | 19379549  | T | C  | 0.07 | <i>TM6SF2</i>    | Missense Variant                    | 0.0943526 | 0.0303544 | 2.10E-03 |
| <b>rs4820268</b>   | 22 | 37469591  | G | A  | 0.46 | <i>TMPRSS6</i>   | Missense Variant                    | 0.0701305 | 0.0160201 | 7.20E-06 |
| <b>rs738409</b>    | 22 | 44324727  | G | C  | 0.21 | <i>PNPLA3</i>    | Missense Variant                    | 0.0770984 | 0.0195081 | 2.60E-05 |

**Table S2. The association between four independent genetic variants and liver PDFF in 14,440 UK Biobank participants. A linear mixed model was used for genetic associations. Levels of significance:  $p < 5 \times 10^{-8}$ .**

| SNP        | CHR | BP       | EA | OA | EAF      | BETA  | SE    | P        | Gene          | Consequence      |
|------------|-----|----------|----|----|----------|-------|-------|----------|---------------|------------------|
| rs1260326  | 2   | 27730940 | T  | C  | 0.39117  | 0.046 | 0.009 | 3.90E-08 | <i>GCKR</i>   | Missense Variant |
| rs58542926 | 19  | 19379549 | T  | C  | 0.926558 | 0.206 | 0.016 | 6.30E-37 | <i>TM6SF2</i> | Missense Variant |
| rs429358   | 19  | 45411941 | T  | C  | 0.848199 | 0.073 | 0.011 | 5.60E-11 | <i>APOE</i>   | Missense Variant |
| rs738409   | 22  | 44324727 | G  | C  | 0.788816 | 0.173 | 0.010 | 5.40E-66 | <i>PNPLA3</i> | Missense Variant |

**Table S3. Associations of cT1 variants with liver blood tests, liver fat PDFF, liver iron content, cardiometabolic traits and diseases. A linear mixed model was used for genetic associations.**

Levels of significance:  $p < 0.05$ .

| SNP         | Chr | Outcome                  | BETA        | SE         | P          | N      |
|-------------|-----|--------------------------|-------------|------------|------------|--------|
| rs759359281 | 1   | liver fat %              | 0.0127587   | 0.0253171  | 6.00E-01   | 14440  |
| rs759359281 | 1   | liver iron content       | -7.53E-03   | 3.42E-02   | 8.26E-01   | 8282   |
| rs759359281 | 1   | ALT                      | 0.01971676  | 0.00492174 | 0.00006175 | 361940 |
| rs759359281 | 1   | AST                      | 0.02097398  | 0.00501843 | 0.00002924 | 360731 |
| rs759359281 | 1   | GGT                      | 0.01092781  | 0.00485173 | 0.02430062 | 361888 |
| rs759359281 | 1   | ALP                      | 0.01569743  | 0.00512336 | 0.0021849  | 362087 |
| rs759359281 | 1   | BMI                      | 0.00760543  | 0.00506501 | 0.13321097 | 378214 |
| rs759359281 | 1   | HDL                      | -0.0109753  | 0.00494659 | 0.0265036  | 331494 |
| rs759359281 | 1   | LDL                      | 0.01033718  | 0.00514988 | 0.04472196 | 361392 |
| rs759359281 | 1   | Triglycerides            | 0.01511628  | 0.00507773 | 0.00291123 | 361785 |
| rs759359281 | 1   | SHBG                     | -0.00536504 | 0.00499736 | 0.28301357 | 328442 |
| rs759359281 | 1   | Systolic blood pressure  | -0.00570476 | 0.00463114 | 0.21801416 | 378821 |
| rs759359281 | 1   | Diastolic blood pressure | -0.00812936 | 0.00493904 | 0.09977707 | 378197 |
| rs759359281 | 1   | Type 2 diabetes          | 0.98768539  | 0.0207639  | 0.55066752 | 379703 |
| rs759359281 | 1   | Heart disease            | 1.0155469   | 0.01793243 | 0.38962282 | 379706 |
| rs759359281 | 1   | Hypertension             | 0.98441287  | 0.0128509  | 0.2215286  | 379708 |
| rs13107325  | 4   | liver fat %              | 0.00785646  | 0.0220298  | 6.40E-01   | 14440  |
| rs13107325  | 4   | liver iron content       | -8.15E-02   | 3.00E-02   | 6.57E-03   | 8282   |
| rs13107325  | 4   | ALT                      | 0.02205415  | 0.0042059  | 1.58E-07   | 361940 |

|             |    |                          |             |            |            |        |
|-------------|----|--------------------------|-------------|------------|------------|--------|
| rs13107325  | 4  | AST                      | 0.06215688  | 0.00428884 | 1.39E-47   | 360731 |
| rs13107325  | 4  | GGT                      | -0.0247514  | 0.0041454  | 2.36E-09   | 361888 |
| rs13107325  | 4  | ALP                      | 0.00261341  | 0.00437779 | 0.55052791 | 362087 |
| rs13107325  | 4  | BMI                      | 0.05491581  | 0.00432855 | 7.11E-37   | 378214 |
| rs13107325  | 4  | HDL                      | -0.08265373 | 0.00422418 | 3.32E-85   | 331494 |
| rs13107325  | 4  | LDL                      | -0.03573906 | 0.00440007 | 4.59E-16   | 361392 |
| rs13107325  | 4  | Triglycerides            | 0.03163324  | 0.00433898 | 3.10E-13   | 361785 |
| rs13107325  | 4  | SHBG                     | -0.00723772 | 0.00426942 | 0.09002952 | 328442 |
| rs13107325  | 4  | Systolic blood pressure  | -0.03389149 | 0.00395976 | 1.14E-17   | 378821 |
| rs13107325  | 4  | Diastolic blood pressure | -0.04711799 | 0.00422344 | 6.74E-29   | 378197 |
| rs13107325  | 4  | Type 2 diabetes          | 1.0718579   | 0.01719493 | 0.00005444 | 379703 |
| rs13107325  | 4  | Heart disease            | 0.98825314  | 0.0153871  | 0.44252172 | 379706 |
| rs13107325  | 4  | Hypertension             | 0.96248733  | 0.01100757 | 0.00051379 | 379708 |
| rs118045231 | 10 | liver fat %              | 0.0818138   | 0.0352523  | 9.30E-03   | 14440  |
| rs118045231 | 10 | liver iron content       | -5.24E-02   | 4.83E-02   | 2.78E-01   | 8282   |
| rs118045231 | 10 | ALT                      | 0.00166892  | 0.00648689 | 0.79696626 | 361940 |
| rs118045231 | 10 | AST                      | 0.00438794  | 0.00661627 | 0.50720039 | 360731 |
| rs118045231 | 10 | GGT                      | -0.00173244 | 0.00639243 | 0.78638002 | 361888 |
| rs118045231 | 10 | ALP                      | 0.00236123  | 0.00675068 | 0.72650622 | 362087 |
| rs118045231 | 10 | BMI                      | 0.0032314   | 0.00666841 | 0.62797191 | 378214 |
| rs118045231 | 10 | HDL                      | -0.01015797 | 0.00652252 | 0.11938393 | 331494 |
| rs118045231 | 10 | LDL                      | -0.00854632 | 0.00678571 | 0.20786529 | 361392 |
| rs118045231 | 10 | Triglycerides            | 0.01254281  | 0.00669167 | 0.06087712 | 361785 |
| rs118045231 | 10 | SHBG                     | -0.00827293 | 0.00659444 | 0.20965037 | 328442 |



|             |    |                          |             |            |            |        |
|-------------|----|--------------------------|-------------|------------|------------|--------|
| rs118045231 | 10 | Systolic blood pressure  | 0.00405816  | 0.00609824 | 0.50575431 | 378821 |
| rs118045231 | 10 | Diastolic blood pressure | 0.00047661  | 0.00650397 | 0.94158377 | 378197 |
| rs118045231 | 10 | Type 2 diabetes          | 1.0283803   | 0.02690784 | 0.29832486 | 379703 |
| rs118045231 | 10 | Heart disease            | 0.97960143  | 0.02383456 | 0.38720926 | 379706 |
| rs118045231 | 10 | Hypertension             | 1.0222345   | 0.01679198 | 0.1903289  | 379708 |
| rs111723834 | 14 | liver fat %              | -0.0240158  | 0.0455128  | 6.70E-01   | 14440  |
| rs111723834 | 14 | liver iron content       | -2.40E-02   | 6.18E-02   | 6.98E-01   | 8282   |
| rs111723834 | 14 | ALT                      | -0.01873864 | 0.00869896 | 0.03123117 | 361940 |
| rs111723834 | 14 | AST                      | -0.01608606 | 0.00887277 | 0.06983735 | 360731 |
| rs111723834 | 14 | GGT                      | -0.02653084 | 0.00857517 | 0.0019755  | 361888 |
| rs111723834 | 14 | ALP                      | -0.02270907 | 0.00905475 | 0.01214307 | 362087 |
| rs111723834 | 14 | BMI                      | -0.01252042 | 0.0089537  | 0.16200836 | 378214 |
| rs111723834 | 14 | HDL                      | 0.03186024  | 0.0087415  | 0.00026773 | 331494 |
| rs111723834 | 14 | LDL                      | -0.00258033 | 0.00910383 | 0.77684502 | 361392 |
| rs111723834 | 14 | Triglycerides            | -0.03984006 | 0.00897427 | 9.03E-06   | 361785 |
| rs111723834 | 14 | SHBG                     | 0.03205497  | 0.00882511 | 0.00028101 | 328442 |
| rs111723834 | 14 | Systolic blood pressure  | -0.01311047 | 0.00818987 | 0.10941868 | 378821 |
| rs111723834 | 14 | Diastolic blood pressure | -0.02248176 | 0.008737   | 0.01007761 | 378197 |
| rs111723834 | 14 | Type 2 diabetes          | 0.91055144  | 0.0378863  | 0.01338647 | 379703 |
| rs111723834 | 14 | Heart disease            | 0.97187684  | 0.03207806 | 0.37385583 | 379706 |
| rs111723834 | 14 | Hypertension             | 0.92386097  | 0.0230377  | 0.00058696 | 379708 |
| rs58542926  | 19 | liver fat %              | 0.261101    | 0.0217732  | 8.10E-32   | 14440  |
| rs58542926  | 19 | liver iron content       | 5.22E-02    | 2.93E-02   | 7.48E-02   | 8282   |
| rs58542926  | 19 | ALT                      | 0.08092395  | 0.00418902 | 4.17E-83   | 361940 |

|            |    |                          |             |            |            |        |
|------------|----|--------------------------|-------------|------------|------------|--------|
| rs58542926 | 19 | AST                      | 0.05932545  | 0.00427257 | 8.00E-44   | 360731 |
| rs58542926 | 19 | GGT                      | 0.01636427  | 0.00413194 | 0.00007483 | 361888 |
| rs58542926 | 19 | ALP                      | -0.09005039 | 0.00436066 | 1.09E-94   | 362087 |
| rs58542926 | 19 | BMI                      | -0.00326425 | 0.00431546 | 0.4494056  | 378214 |
| rs58542926 | 19 | HDL                      | -0.00408918 | 0.00420784 | 0.33115097 | 331494 |
| rs58542926 | 19 | LDL                      | -0.13974327 | 0.00437875 | 3.51E-223  | 361392 |
| rs58542926 | 19 | Triglycerides            | -0.10360269 | 0.00432086 | 6.02E-127  | 361785 |
| rs58542926 | 19 | SHBG                     | -0.00340488 | 0.00425019 | 0.42306731 | 328442 |
| rs58542926 | 19 | Systolic blood pressure  | 0.01470579  | 0.00394581 | 0.00019385 | 378821 |
| rs58542926 | 19 | Diastolic blood pressure | 0.02296663  | 0.00420855 | 4.84E-08   | 378197 |
| rs58542926 | 19 | Type 2 diabetes          | 1.0846765   | 0.01710389 | 2.01E-06   | 379703 |
| rs58542926 | 19 | Heart disease            | 0.95968678  | 0.01551553 | 0.00799994 | 379706 |
| rs58542926 | 19 | Hypertension             | 1.024177    | 0.01084989 | 0.02767896 | 379708 |
| rs4820268  | 22 | liver fat %              | 0.0123012   | 0.0114339  | 3.20E-01   | 14440  |
| rs4820268  | 22 | liver iron content       | -1.04E-01   | 1.55E-02   | 2.63E-11   | 8282   |
| rs4820268  | 22 | ALT                      | -0.0039429  | 0.00221457 | 0.07500625 | 361940 |
| rs4820268  | 22 | AST                      | -0.00979042 | 0.00225823 | 0.00001455 | 360731 |
| rs4820268  | 22 | GGT                      | -0.0024286  | 0.002183   | 0.26592274 | 361888 |
| rs4820268  | 22 | ALP                      | -0.00683427 | 0.00230523 | 0.00303023 | 362087 |
| rs4820268  | 22 | BMI                      | -0.00240988 | 0.00227925 | 0.29036959 | 378214 |
| rs4820268  | 22 | HDL                      | -0.00047719 | 0.00222443 | 0.83014014 | 331494 |
| rs4820268  | 22 | LDL                      | 0.00764322  | 0.00231692 | 0.00097086 | 361392 |
| rs4820268  | 22 | Triglycerides            | -0.00949943 | 0.00228489 | 0.00003218 | 361785 |
| rs4820268  | 22 | SHBG                     | -0.00500005 | 0.00224719 | 0.0260806  | 328442 |

|           |    |                          |             |            |            |        |
|-----------|----|--------------------------|-------------|------------|------------|--------|
| rs4820268 | 22 | Systolic blood pressure  | 0.00294821  | 0.00208454 | 0.15726715 | 378821 |
| rs4820268 | 22 | Diastolic blood pressure | -0.00187424 | 0.00222338 | 0.39924638 | 378197 |
| rs4820268 | 22 | Type 2 diabetes          | 1.000291    | 0.00930691 | 0.97502587 | 379703 |
| rs4820268 | 22 | Heart disease            | 1.019562    | 0.00810697 | 0.01686224 | 379706 |
| rs4820268 | 22 | Hypertension             | 1.012714    | 0.0057664  | 0.02845281 | 379708 |
| rs738409  | 22 | liver fat %              | 0.233979    | 0.0138955  | 1.20E-63   | 14440  |
| rs738409  | 22 | liver iron content       | 5.36E-02    | 1.89E-02   | 4.66E-03   | 8282   |
| rs738409  | 22 | ALT                      | 0.09831972  | 0.00267411 | 2.18E-295  | 361940 |
| rs738409  | 22 | AST                      | 0.09945885  | 0.00272673 | 9.25E-291  | 360731 |
| rs738409  | 22 | GGT                      | -0.00130433 | 0.00264091 | 0.62138227 | 361888 |
| rs738409  | 22 | ALP                      | -0.01233248 | 0.00278871 | 9.77E-06   | 362087 |
| rs738409  | 22 | BMI                      | -0.00899027 | 0.00275861 | 0.00111822 | 378214 |
| rs738409  | 22 | HDL                      | -0.01596964 | 0.00269179 | 2.98E-09   | 331494 |
| rs738409  | 22 | LDL                      | -0.01270562 | 0.00280268 | 5.81E-06   | 361392 |
| rs738409  | 22 | Triglycerides            | -0.00292861 | 0.00276422 | 0.28938526 | 361785 |
| rs738409  | 22 | SHBG                     | 0.04467104  | 0.00271863 | 1.20E-60   | 328442 |
| rs738409  | 22 | Systolic blood pressure  | -0.00002693 | 0.00252259 | 0.99148313 | 378821 |
| rs738409  | 22 | Diastolic blood pressure | 0.00254793  | 0.00269094 | 0.34371227 | 378197 |
| rs738409  | 22 | Type 2 diabetes          | 1.0346154   | 0.01116244 | 0.00229915 | 379703 |
| rs738409  | 22 | Heart disease            | 0.97555595  | 0.00985126 | 0.01200007 | 379706 |
| rs738409  | 22 | Hypertension             | 0.99394356  | 0.00697888 | 0.38404798 | 379708 |

**Table S4. The association between cT1 variants and ALT / AST measures in Chambers *et al.*[21]**

| SNP                                 | CHR | EA | OA | EAF  | Gene      | Beta ALT | SE ALT | P ALT    | Beta AST | SE AST | P AST    |
|-------------------------------------|-----|----|----|------|-----------|----------|--------|----------|----------|--------|----------|
| rs759359281                         | 1   | C  | CA | 0.06 | SLC30A10  | NA       | NA     | NA       | NA       | NA     | NA       |
| rs13107325                          | 4   | T  | C  | 0.07 | SLC39A8   | 0.01     | 0.005  | 0.2745   | 0.0139   | 0.004  | 0.005    |
| rs111723834                         | 14  | A  | G  | 0.02 | PCK2, NRL | NA       | NA     | NA       | NA       | NA     | NA       |
| rs10401969<br>(rs58542926<br>proxy) | 19  | C  | T  | 0.88 | TM6SF2    | 0.0111   | 0.0038 | 0.0003   | 0.0164   | 0.004  | 0.00004  |
| rs4820268                           | 22  | G  | A  | 0.46 | TMPRSS6   | 0.0001   | 0.0016 | 0.515    | 0.0012   | 0.002  | 0.189    |
| rs738409                            | 22  | G  | C  | 0.21 | PNPLA3    | 0.0254   | 0.0021 | 1.21E-45 | 0.0254   | 0.0023 | 1.23E-34 |

**Table S5. Genetic correlation analyses between cT1 measures and 120 predominantly metabolic traits.** For clarity, we present traits where  $p < 0.05$  (t-test, levels of significance:  $p < 0.01$ ).

| Phenotype                                         | PMID     | rg     | SE     | P      |
|---------------------------------------------------|----------|--------|--------|--------|
| HOMA-IR                                           | 20081858 | 0.5272 | 0.1489 | 0.0004 |
| Mean diameter for VLDL particles                  | 27005778 | 0.5207 | 0.146  | 0.0004 |
| Glycoprotein acetyls; mainly a1-acid glycoprotein | 27005778 | 0.5027 | 0.1566 | 0.0013 |
| Triglycerides in small HDL                        | 27005778 | 0.4957 | 0.1897 | 0.009  |
| Leucine                                           | 27005778 | 0.4918 | 0.2024 | 0.0151 |
| Tyrosine                                          | 27005778 | 0.4548 | 0.1755 | 0.0096 |
| Isoleucine                                        | 27005778 | 0.4422 | 0.1724 | 0.0103 |
| Fasting insulin main effect                       | 22581228 | 0.4277 | 0.1158 | 0.0002 |

|                                                          |          |        |        |          |
|----------------------------------------------------------|----------|--------|--------|----------|
| Phenylalanine                                            | 27005778 | 0.4266 | 0.2047 | 0.0371   |
| Triglycerides in medium VLDL                             | 27005778 | 0.4247 | 0.1547 | 0.0061   |
| Type 2 Diabetes                                          | 22885922 | 0.4239 | 0.1043 | 4.79E-05 |
| Triglycerides in small VLDL                              | 27005778 | 0.4116 | 0.1423 | 0.0038   |
| Concentration of medium VLDL particles                   | 27005778 | 0.4041 | 0.1348 | 0.0027   |
| Valine                                                   | 27005778 | 0.4034 | 0.1829 | 0.0274   |
| Waist circumference                                      | 25673412 | 0.3917 | 0.0699 | 2.09E-08 |
| Body fat                                                 | 26833246 | 0.388  | 0.0825 | 2.59E-06 |
| Total lipids in medium VLDL                              | 27005778 | 0.3876 | 0.138  | 0.005    |
| Body mass index                                          | 20935630 | 0.3856 | 0.061  | 2.57E-10 |
| HOMA-B                                                   | 20081858 | 0.3842 | 0.1181 | 0.0011   |
| Triglycerides in large VLDL                              | 27005778 | 0.3841 | 0.1419 | 0.0068   |
| Total lipids in large VLDL                               | 27005778 | 0.3802 | 0.1393 | 0.0063   |
| Concentration of very large VLDL particles               | 27005778 | 0.3752 | 0.1435 | 0.0089   |
| Phospholipids in chylomicrons and largest VLDL particles | 27005778 | 0.3727 | 0.1499 | 0.0129   |
| Waist-to-hip ratio                                       | 25673412 | 0.3658 | 0.0749 | 1.05E-06 |
| Total cholesterol in large VLDL                          | 27005778 | 0.3603 | 0.1341 | 0.0072   |
| Total lipids in very large VLDL                          | 27005778 | 0.3552 | 0.1381 | 0.0101   |
| Concentration of large VLDL particles                    | 27005778 | 0.3501 | 0.1472 | 0.0174   |
| Triglycerides in chylomicrons and largest VLDL particles | 27005778 | 0.3464 | 0.1544 | 0.0249   |
| Concentration of small VLDL particles                    | 27005778 | 0.3443 | 0.1317 | 0.009    |
| Serum total triglycerides                                | 27005778 | 0.3422 | 0.1385 | 0.0135   |
| Total lipids in chylomicrons and largest VLDL particles  | 27005778 | 0.3325 | 0.15   | 0.0266   |
| Obesity class 2                                          | 23563607 | 0.3294 | 0.0746 | 1.01E-05 |
| Phospholipids in large VLDL                              | 27005778 | 0.3276 | 0.1399 | 0.0192   |
| Free cholesterol in large VLDL                           | 27005778 | 0.3249 | 0.1315 | 0.0135   |
| Triglycerides in very large VLDL                         | 27005778 | 0.3247 | 0.1299 | 0.0124   |
| Phospholipids in medium VLDL                             | 27005778 | 0.3244 | 0.1429 | 0.0232   |
| Phospholipids in very large VLDL                         | 27005778 | 0.3237 | 0.1428 | 0.0234   |
| Total lipids in small VLDL                               | 27005778 | 0.3235 | 0.1331 | 0.0151   |

|                                                          |          |         |        |          |
|----------------------------------------------------------|----------|---------|--------|----------|
| Cholesterol esters in large VLDL                         | 27005778 | 0.3149  | 0.1277 | 0.0137   |
| Concentration of chylomicrons and largest VLDL particles | 27005778 | 0.3128  | 0.1403 | 0.0257   |
| Average number of methylene groups per a double bond     | 27005778 | 0.303   | 0.1268 | 0.0169   |
| Phospholipids in small VLDL                              | 27005778 | 0.2978  | 0.1374 | 0.0302   |
| Free cholesterol in medium VLDL                          | 27005778 | 0.2928  | 0.1409 | 0.0377   |
| Total cholesterol in medium VLDL                         | 27005778 | 0.2909  | 0.1358 | 0.0322   |
| Hip circumference                                        | 25673412 | 0.2898  | 0.0616 | 2.56E-06 |
| Obesity class 3                                          | 23563607 | 0.2765  | 0.1105 | 0.0123   |
| HbA1C                                                    | 20858683 | 0.275   | 0.1233 | 0.0258   |
| Cholesterol esters in medium VLDL                        | 27005778 | 0.2624  | 0.1325 | 0.0476   |
| Crohns disease                                           | 26192919 | 0.1897  | 0.0854 | 0.0263   |
| Coronary artery disease                                  | 26343387 | 0.1822  | 0.0669 | 0.0065   |
| Triglycerides                                            | 20686565 | 0.1508  | 0.0762 | 0.0476   |
| Ratio of bisallylic groups to double bonds               | 27005778 | -0.2844 | 0.1073 | 0.008    |
| Ratio of bisallylic groups to total fatty acids          | 27005778 | -0.2893 | 0.117  | 0.0134   |
| HDL cholesterol                                          | 20686565 | -0.307  | 0.0686 | 7.58E-06 |
| Average number of double bonds in a fatty acid chain     | 27005778 | -0.3073 | 0.1307 | 0.0187   |
| Citrate                                                  | 27005778 | -0.3293 | 0.1562 | 0.0351   |
| Apolipoprotein A-I                                       | 27005778 | -0.4093 | 0.1882 | 0.0296   |
| Acetate                                                  | 27005778 | -0.4596 | 0.1846 | 0.0128   |
| Total cholesterol in HDL                                 | 27005778 | -0.4876 | 0.1594 | 0.0022   |
| Total lipids in large HDL                                | 27005778 | -0.5206 | 0.1392 | 0.0002   |
| Concentration of very large HDL particles                | 27005778 | -0.5545 | 0.215  | 0.0099   |
| Phospholipids in very large HDL                          | 27005778 | -0.5554 | 0.1692 | 0.001    |
| Total lipids in very large HDL                           | 27005778 | -0.6045 | 0.2178 | 0.0055   |
| Free cholesterol in very large HDL                       | 27005778 | -0.6146 | 0.2366 | 0.0094   |
| Total cholesterol in very large HDL                      | 27005778 | -0.6232 | 0.3029 | 0.0396   |

**Table S6. Mendelian randomisation sensitivity analyses.** Egger test, weighted median (WM) and penalised weighted median (PWM) show similar directional effects with the IVW method. Levels of significance:  $p < 0.05$ .

| Exposure                                                | betaEgger | pEgger | betaWM | pWM      | betaPWM | pPWM  | N_snp | PMID           |
|---------------------------------------------------------|-----------|--------|--------|----------|---------|-------|-------|----------------|
| Favourable adiposity                                    | -0.675    | 0.201  | -0.328 | 0.149    | -0.284  | 0.221 | 14    | PMID: 30352878 |
| Insulin resistance                                      | 0.327     | 0.337  | 0.512  | 0.001    | 0.488   | 0.001 | 53    | PMID: 27841877 |
| Insulin secretion                                       | 0.117     | 0.697  | 0.067  | 0.729    | 0.123   | 0.501 | 11    | PMID: 22885924 |
| Type 2 diabetes                                         | 0.072     | 0.1312 | 0.055  | 0.068    | 0.053   | 0.089 | 89    | PMID: 29632382 |
| 2 hour Glucose                                          | -0.055    | 0.903  | 0.015  | 0.851    | -0.007  | 0.931 | 8     | PMID: 22885924 |
| Fasting glucose                                         | 0.0382    | 0.855  | -0.176 | 0.221    | -0.172  | 0.258 | 33    | PMID: 22885924 |
| Fasting Insulin                                         | -4.555    | 0.014  | 0.792  | 0.014    | 0.838   | 0.008 | 14    | PMID: 22885924 |
| NAFLD                                                   | 0.391     | 0.107  | 0.365  | 4.06E-11 | -0.049  | 0.806 | 4     | PMID: 21423719 |
| Body fat percentage                                     | 1.173     | 0.160  | 0.430  | 0.008    | 0.435   | 0.007 | 10    | PMID: 26833246 |
| BMI                                                     | 0.355     | 0.014  | 0.251  | 0.007    | 0.242   | 0.005 | 73    | PMID: 25673413 |
| Coronary artery disease                                 | -0.025    | 0.635  | -0.036 | 0.266    | -0.045  | 0.202 | 64    | PMID: 26343387 |
| Systolic blood pressure                                 | -0.046    | 0.090  | -0.002 | 0.554    | -0.011  | 0.055 | 89    | PMID: 27618452 |
| Diastolic blood pressure                                | -0.099    | 0.006  | -0.012 | 0.087    | -0.013  | 0.117 | 109   | PMID: 27618452 |
| LDL Cholesterol                                         | -0.031    | 0.675  | -0.035 | 0.504    | -0.035  | 0.503 | 80    | PMID: 24097068 |
| Triglycerides                                           | -0.127    | 0.170  | -0.079 | 0.219    | -0.067  | 0.424 | 62    | PMID: 24097068 |
| HDL Cholesterol                                         | 0.033     | 0.796  | 0.022  | 0.646    | 0.022   | 0.646 | 98    | PMID: 24097068 |
| Waist Hip ratio BMI adjusted                            | 0.100     | 0.701  | 0.072  | 0.471    | 0.015   | 0.881 | 53    | PMID: 30239722 |
| Waist Hip ratio BMI adjusted (Female specific variants) | 0.087     | 0.537  | 0.247  | 0.001    | 0.181   | 0.012 | 47    | PMID: 30239722 |
| Waist Hip ratio BMI adjusted (Male specific variants)   | 3.905     | 0.269  | 0.187  | 0.435    | 0.017   | 0.947 | 6     | PMID: 30239722 |
| Ferritin                                                | -0.372    | 0.329  | -0.567 | 8.35E-08 | -0.100  | 0.521 | 6     | PMID: 25352340 |
| Transferrin                                             | 0.039     | 0.679  | 0.092  | 0.032    | 0.025   | 0.443 | 9     | PMID: 25352340 |

|                        |        |       |        |          |        |        |     |                |
|------------------------|--------|-------|--------|----------|--------|--------|-----|----------------|
| Transferrin saturation | -0.228 | 0.029 | -0.238 | 1.48E-11 | -0.100 | 0.378  | 5   | PMID: 25352340 |
| Iron                   | -0.464 | 0.009 | -0.332 | 1.72E-12 | 0.0117 | 0.942  | 5   | PMID: 25352340 |
| Height                 | -0.087 | 0.150 | 0.001  | 0.966    | 0.0124 | 0.6476 | 809 | PMID: 30124842 |



## References

- [1] Pavlides M, Banerjee R, Tunnicliffe EM, Kelly C, Collier J, Wang LM, et al. Multiparametric magnetic resonance imaging for the assessment of non-alcoholic fatty liver disease severity. *Liver Int.* 2017;37:1065–1073.
- [2] Pavlides M, Banerjee R, Sellwood J, Kelly CJ, Robson MD, Booth JC, et al. Multiparametric magnetic resonance imaging predicts clinical outcomes in patients with chronic liver disease. *J. Hepatol.* 2016;64:308–315.
- [3] Banerjee R, Pavlides M, Tunnicliffe EM, Piechnik SK, Sarania N, Philips R, et al. Multiparametric magnetic resonance for the non-invasive diagnosis of liver disease. *J. Hepatol.* 2014;60:69–77.
- [4] Cheung A, Neuschwander-Tetri BA, Kleiner DE, Schabel E, Rinella M, Harrison S, et al. Defining Improvement in Nonalcoholic Steatohepatitis for Treatment Trial Endpoints: Recommendations from the Liver Forum. *Hepatology* [Internet]. 2019; Available from: <http://dx.doi.org/10.1002/hep.30672>
- [5] Harrison SA, Rossi SJ, Paredes AH, Trotter JF, Bashir MR, Guy CD, et al. NGM282 Improves Liver Fibrosis and Histology in 12 Weeks in Patients with Nonalcoholic Steatohepatitis. *Hepatology* [Internet]. 2019; Available from: <http://dx.doi.org/10.1002/hep.30590>
- [6] Giri A, Hellwege JN, Keaton JM, Park J, Qiu C, Warren HR, et al. Trans-ethnic association study of blood pressure determinants in over 750,000 individuals. *Nat. Genet.* 2019;51:51–62.
- [7] Yengo L, Sidorenko J, Kemper KE, Zheng Z, Wood AR, Weedon MN, et al. Meta-analysis of genome-wide association studies for height and body mass index in ~700000 individuals of European ancestry. *Hum. Mol. Genet.* 2018;27:3641–3649.
- [8] Cantor RM, Lange K, Sinsheimer JS. Prioritizing GWAS results: A review of statistical methods and recommendations for their application. *Am. J. Hum. Genet.* 2010;86:6–22.
- [9] Non-invasive Rapid Assessment of NAFLD Using Magnetic Resonance Imaging With LiverMultiScan - Full Text View - ClinicalTrials.gov [Internet]. [cited 2019 Jun 11]; Available from: <https://clinicaltrials.gov/ct2/show/NCT03289897>
- [10] Pavlides M, Banerjee R, Kelly CJ, Robson MD, Neubauer S, Barnes E. Reply to: “Multiparametric magnetic resonance imaging to predict clinical outcomes in patients with chronic liver disease: A cautionary note on a promising technique.” *J. Hepatol.* 2017;66:457–458.
- [11] Harrison SA, Dennis A, Fiore MM, Kelly MD, Kelly CJ, Paredes AH, et al. Utility and variability of three non-invasive liver fibrosis imaging modalities to evaluate efficacy of GR-MD-02 in subjects with NASH and bridging fibrosis during a phase-2 randomized clinical trial. *PLoS One.* 2018;13:e0203054.

- [12] Mojtahed A, Kelly CJ, Herlihy AH, Kin S, Wilman HR, McKay A, et al. Reference range of liver corrected T1 values in a population at low risk for fatty liver disease—a UK Biobank sub-study, with an appendix of interesting cases. *Abdom Radiol (NY)*. 2019;44:72–84.
- [13] McDonald N, Eddowes PJ, Hodson J, Semple SIK, Davies NP, Kelly CJ, et al. Multiparametric magnetic resonance imaging for quantitation of liver disease: a two-centre cross-sectional observational study. *Sci. Rep.* 2018;8:9189.
- [14] Ostovaneh MR, Ambale-Venkatesh B, Fujii T, Bakhshi H, Shah R, Murthy VL, et al. Association of Liver Fibrosis With Cardiovascular Diseases in the General Population: The Multi-Ethnic Study of Atherosclerosis (MESA). *Circ. Cardiovasc. Imaging*. 2018;11:e007241.
- [15] Liu C-Y, Liu Y-C, Wu C, Armstrong A, Volpe GJ, van der Geest RJ, et al. Evaluation of age-related interstitial myocardial fibrosis with cardiac magnetic resonance contrast-enhanced T1 mapping: MESA (Multi-Ethnic Study of Atherosclerosis). *J. Am. Coll. Cardiol.* 2013;62:1280–1287.
- [16] Mealer RG, Jenkins BG, Chen C-Y, Daly MJ, Ge T, Lehoux S, et al. A schizophrenia risk locus alters brain metal transport and plasma glycosylation [Internet]. *bioRxiv*. 2019 [cited 2019 Sep 26];757088. Available from: <https://www.biorxiv.org/content/10.1101/757088v1>
- [17] Bachtiar V, Kelly MD, Wilman HR, Jacobs J, Newbould R, Kelly CJ, et al. Repeatability and reproducibility of multiparametric magnetic resonance imaging of the liver. *PLoS One*. 2019;14:e0214921.
- [18] Hingorani A, Humphries S. Nature’s randomised trials. *Lancet*. 2005;366:1906–1908.
- [19] Lawlor DA, Tilling K, Davey Smith G. Triangulation in aetiological epidemiology. *Int. J. Epidemiol.* 2016;45:1866–1886.
- [20] Pierce BL, Burgess S. Efficient Design for Mendelian Randomization Studies: Subsample and 2-Sample Instrumental Variable Estimators. *Am. J. Epidemiol.* 2013;178:1177–1184.
- [21] Chambers JC, Zhang W, Sehmi J, Li X, Wass MN, Van der Harst P, et al. Genome-wide association study identifies loci influencing concentrations of liver enzymes in plasma. *Nat. Genet.* 2011;43:1131–1138.
