# Supplementary material for: Genome-wide and Mendelian randomisation studies of liver MRI yield insights into the pathogenesis of steatohepatitis
Source: PubMed Central journal article supplement (PMC7372222; doi:10.1016/j.jhep.2020.03.032), 2020-08
Supplement: mmc2.pdf [file mmc2.pdf]

## CTAT methods

Tables for a “Complete, Transparent, Accurate and Timely account” (CTAT) are now mandatory for all revised submissions. The aim is to enhance the reproducibility of methods.

- Only include the parts relevant to your study
- Refer to the CTAT in the main text as ‘Supplementary CTAT Table’
- Do not add subheadings
- Add as many rows as needed to include all information
- Only include one item per row

**If the CTAT form is not relevant to your study, please outline the reasons why:**

|                                                                                                                                                                                                                                         |
|-----------------------------------------------------------------------------------------------------------------------------------------------------------------------------------------------------------------------------------------|
| All methods have been described in manuscript – all generated data (liver cT1 data for UK Biobank participants), GWAS summary statistics) will be sent back to UK Biobank and made publicly available within six months of publication. |
|-----------------------------------------------------------------------------------------------------------------------------------------------------------------------------------------------------------------------------------------|

### 1.1 Antibodies

| Name | Citation | Supplier | Cat no. | Clone no. |
|------|----------|----------|---------|-----------|
|      |          |          |         |           |

### 1.2 Cell lines

| Name | Citation | Supplier | Cat no. | Passage no. | Authentication test method |
|------|----------|----------|---------|-------------|----------------------------|
|      |          |          |         |             |                            |

### 1.3 Organisms

| Name | Citation | Supplier | Strain | Sex | Age | Overall n number |
|------|----------|----------|--------|-----|-----|------------------|
|      |          |          |        |     |     |                  |

### 1.4 Sequence based reagents

| Name | Sequence | Supplier |
|------|----------|----------|
|      |          |          |

### 1.5 Biological samples

| Description | Source | Identifier |
|-------------|--------|------------|
|             |        |            |

### 1.6 Deposited data

| Name of repository | Identifier | Link |
|--------------------|------------|------|
| NA                 |            |      |

**1.7 Software**

| <b>Software name</b> | <b>Manufacturer</b> | <b>Version</b> |
|----------------------|---------------------|----------------|
| <b>GEMMA</b>         | <b>Zhou lab</b>     | <b>0.92</b>    |
| <b>PLINK</b>         | <b>Purcell lab</b>  | <b>1.9</b>     |
|                      |                     |                |
|                      |                     |                |

**1.8 Other (e.g. drugs, proteins, vectors etc.)**

|  |  |  |
|--|--|--|
|  |  |  |
|  |  |  |

**1.9 Please provide the details of the corresponding methods author for the manuscript:**

|                          |
|--------------------------|
| <b>Hanieh Yaghootkar</b> |
|--------------------------|

**2.0 Please confirm for randomised controlled trials all versions of the clinical protocol are included in the submission. These will be published online as supplementary information.**

|  |
|--|
|  |
|--|
